# Supplementary material for: Acridin-9(10H)-one based thermally activated delayed fluorescence material: simultaneous optimization of RISC and radiation processes to boost luminescence efficiency
Source: Royal Society of Chemistry journal article supplement (doi:10.1039/d1tc00592h), 2021-01-01
Supplement: d1tc00592h1.pdf [file d1tc00592h1.pdf]

## **Supporting Information**

**For**

### **Acridin-9(10*H*)-one based thermally activated delayed fluorescence material: Simultaneous optimization of RISC and radiation processes to boost luminescence efficiencies**

Yongqiang Mei, Di Liu,\* Jiuyan Li,\* Huiting Li, Wenkui Wei

State Key Laboratory of Fine Chemicals, College of Chemical Engineering, Dalian

University of Technology, 2 Linggong Road, Dalian, 116024, China.

E-mail: liudi@dlut.edu.cn, jiuyanli@dlut.edu.cn.

## **Contents**

1. Experimental Section
2. Supplemental Tables and Figures
3. References

## 1. Experimental Section

### Compound Synthesis and Characterization.

Important intermediates 3,6-difluoroacridin-9(10H)-one (1) and 3,6-difluoro-10-phenylacridin-9(10H)-one (2) were synthesized according to literature methods.<sup>1</sup>

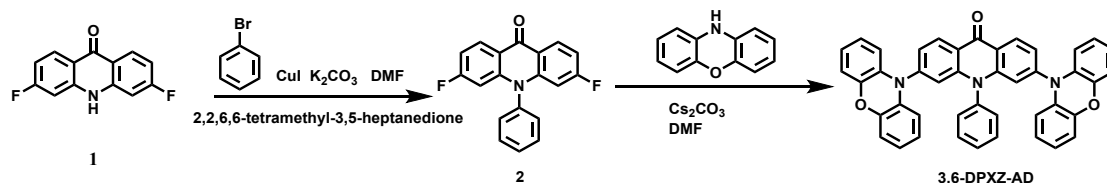

Scheme S1. Chemical structures and synthetic routes for 3,6-DPXZ-AD

*Synthesis of 2:* 1-bromobenzene (192 mg, 1.22 mmol), 1 (255 mg, 1.10 mmol), K<sub>2</sub>CO<sub>3</sub> (170 mg, 1.21 mmol.), CuI (21 mg, 0.11 mmol.), 2,2,6,6-tetramethyl-3,5-heptanedione (38 mg, 0.21 mmol) were dissolved in dry N,N-Dimethylformamide (DMF) (10 mL) in a three-necked round flask. The mixture was degassed and refluxed under nitrogen atmosphere for 24 h. After cooling to room temperature, the reaction mixture was quenched with H<sub>2</sub>O and extracted with dichloromethane (DCM, 3×10 mL). The combined organic phase was dried and treated by rotary evaporator to remove the solvent. The generated residue was then isolated by column chromatography (eluent: DCM/petroleum ether =1:1) to provide compound 2 (198 mg.). Yield: 60%. TOF-EI-MS (*m/z*): cal. for C<sub>19</sub>H<sub>11</sub>F<sub>2</sub>NO 307.0809; Found 307.0814 [M]<sup>+</sup>.

*Synthesis of 3,6-DPXZ-AD:* A mixture of 2 (400 mg, 1.30 mmol), phenoxazine (PXZ) (523 mg, 2.86 mmol), cesium carbonate (1694 mg, 5.2 mmol) and 20 mL of dry DMF was stirred and refluxed at 165 °C for 24 h. After cooling down to room

temperature, the reaction mixture was poured into water and the precipitated solid was filtered under reduced pressure. The residue was purified by column chromatography on silica gel using DCM as the eluent to give a light orange red solid. Repeated recrystallization from CHCl<sub>3</sub>/CH<sub>3</sub>OH gave pure product.

*3,6-DPXZ-AD*: a light orange red solid, 452 mg, yield 50%. <sup>1</sup>H NMR (400 MHz, Chloroform-*d*) δ 8.84 (d, *J* = 8.4 Hz, 2H), 7.66 (t, *J* = 7.3 Hz, 2H), 7.62 – 7.57 (m, 1H), 7.39 (d, *J* = 7.6 Hz, 2H), 7.31 (d, *J* = 8.5 Hz, 2H), 6.80 (s, 2H), 6.70 (q, *J* = 7.6 Hz, 8H), 6.62 (t, *J* = 7.4 Hz, 4H), 5.97 (d, *J* = 7.9 Hz, 4H). <sup>13</sup>C NMR (126 MHz, Chloroform-*d*) δ: 176.87, 145.14, 144.07, 143.97, 137.94, 133.53, 131.74, 130.85, 130.30, 129.28, 123.68, 123.27, 121.93, 121.49, 118.85, 115.74, 113.37. TOF-MALDI-MS (*m/z*): cal. for C<sub>43</sub>H<sub>27</sub>N<sub>3</sub>O<sub>3</sub> 633.2052; Found: 633.2033 [M]<sup>+</sup>. Anal. Calcd for C<sub>43</sub>H<sub>27</sub>N<sub>3</sub>O<sub>3</sub>: C, 81.50; H, 4.29; N, 6.63; Found: C, 81.48; H, 4.30; N, 6.61.

### **Kinetic parameters calculation of photo-physical processes**

To quantificationally discuss and compare the RISC process of materials, rate constants of different kinetic processes were calculated following equations<sup>2</sup> as shown below:

$$K_P = 1/\tau_{PF}$$

$$K_D = 1/\tau_{DF}$$

$$K_R = \Phi_{PF}/\tau_{PF}$$

$$\Phi_{PL} = K_R/(K_R + K_{NR})$$

$$\Phi_{PF} = K_R/(K_R + K_{ISC} + K_{NR})$$

$$K_{RISC} = K_P K_D \Phi_{DF} / K_{ISC} \Phi_{PF}$$

$K_P$ ,  $K_D$ ,  $K_R$ ,  $K_{NR}$ ,  $K_{ISC}$ ,  $K_{RISC}$  represent the rate constants of prompt process, delay process, radiation, non-radiation, intersystem crossing, and reverse intersystem crossing, respectively.  $\Phi_{PL}$ ,  $\Phi_{PF}$ ,  $\Phi_{DF}$ ,  $\tau_{PF}$ , and  $\tau_{DF}$  represent total PLQY, quantum yield of the prompt component, quantum yield of the delayed component, average lifetimes of the prompt and delayed components, respectively.

## 2. Supplemental tables and figures

**Table S1** Experimentally obtained physical parameters of 3,6-DPXZ-AD.

| compound    | $\lambda_{abs}^a$<br>(nm) | $\lambda_{em}^a$<br>(nm) | $S_1^b$<br>(eV)                | $T_1^b$<br>(eV)                            | HOMO<br>/LUMO <sup>d</sup><br>(eV) | $T_d$ / $T_g^e$<br>(°C) |
|-------------|---------------------------|--------------------------|--------------------------------|--------------------------------------------|------------------------------------|-------------------------|
| 3,6-DPXZ-AD | 376/395/437               | 566                      | 2.24<br><sup>c</sup> 2.20/2.15 | 2.44<br><sup>c</sup> 2.34/<br>(2.35, 2.47) | -5.10<br>/-2.79                    | 441.3<br>/148.7         |
| AD-Ph       | 374/<br>392               | 400/<br>421              | 3.02                           | 2.60                                       |                                    |                         |
| PXZ-Ph      | 324                       | 292/<br>389              | 3.39                           | 2.72                                       |                                    |                         |

<sup>a</sup> Absorption and fluorescence peak wavelengths in dilute toluene solutions; <sup>b</sup> Estimated from the fluorescence and phosphorescence peaks of 3,6-DPXZ-AD, AD-Ph and PXZ-Ph at 77 K in 2-MeTHF; <sup>c</sup> Estimated from the fluorescence and phosphorescence peaks of 3,6-DPXZ-AD at 77 K in THF, and DCM; <sup>d</sup> Determined from electrochemical measurements; <sup>e</sup> Decomposition temperature ( $T_d$ ) at 5 wt% weight loss obtained from TGA measurements, and glass transition temperature ( $T_g$ ) obtained from DSC measurements.

**Table S2.** Crystal data and structure refinement of 3,6-DPXZ-AD.

|                                             |                                                                                   |
|---------------------------------------------|-----------------------------------------------------------------------------------|
| Identification code                         | 3,6-DPXZ-AD (CCDC: 2068551)                                                       |
| Empirical formula                           | C <sub>4</sub> H <sub>27</sub> N <sub>3</sub> O <sub>3</sub> (CHCl <sub>3</sub> ) |
| Formula weight                              | 753.04                                                                            |
| Temperature/K                               | 150.0                                                                             |
| Crystal system                              | triclinic                                                                         |
| Space group                                 | P-1                                                                               |
| a/Å                                         | 12.8076(7)                                                                        |
| b/Å                                         | 12.8293(8)                                                                        |
| c/Å                                         | 13.3517(7)                                                                        |
| $\alpha$ /°                                 | 92.432(2)                                                                         |
| $\beta$ /°                                  | 115.385(2)                                                                        |
| $\gamma$ /°                                 | 114.570(2)                                                                        |
| Volume/Å <sup>3</sup>                       | 1736.32(17)                                                                       |
| Z                                           | 35                                                                                |
| $\rho_{\text{calc}}$ /cm <sup>3</sup>       | 1.440                                                                             |
| $\mu$ /mm <sup>-1</sup>                     | 0.129                                                                             |
| F(000)                                      | 770.0                                                                             |
| Crystal size/mm <sup>3</sup>                | 0.14 × 0.16 × 0.12                                                                |
| Radiation                                   | MoK $\alpha$ ( $\lambda$ = 0.71073)                                               |
| 2 $\theta$ range for data collection/°      | 4.534 to 59.988                                                                   |
| Index ranges                                | -17 ≤ h ≤ 18, -18 ≤ k ≤ 18, -18 ≤ l ≤ 18                                          |
| Reflections collected                       | 51766                                                                             |
| Independent reflections                     | 10102 [ $R_{\text{int}}$ = 0.0807, $R_{\text{sigma}}$ = 0.0670]                   |
| Data/restraints/parameters                  | 10102/0/478                                                                       |
| Goodness-of-fit on F <sup>2</sup>           | 1.039                                                                             |
| Final R indexes [ $I \geq 2\sigma(I)$ ]     | $R_1$ = 0.0653, $wR_2$ = 0.1826                                                   |
| Final R indexes [all data]                  | $R_1$ = 0.1098, $wR_2$ = 0.2094                                                   |
| Largest diff. peak/hole / e Å <sup>-3</sup> | 0.59/-0.92                                                                        |

**Table S3.** Summary of device performance data of the TADF-OLED. <sup>a</sup>

| Device           | $V_{\text{on}}$<br>[V] | $\eta_c$<br>[cd A <sup>-1</sup> ] | $\eta_p$<br>[lm W <sup>-1</sup> ] | $\eta_{\text{ext}}$ <sup>b</sup><br>[%] | CIE (x, y)  |
|------------------|------------------------|-----------------------------------|-----------------------------------|-----------------------------------------|-------------|
| 3,6-DPXZ-AD: CBP | 2.2                    | 98.0                              | 109.9                             | 30.6/28.9/22.4                          | (0.43,0.55) |

<sup>a</sup>  $V_{\text{on}}$ , turn-on voltage at a brightness of 1 cd m<sup>-2</sup>;  $\eta_c$  and  $\eta_p$ , maximum current efficiency and power efficiency, respectively; CIE (x, y), Commission International de l'Eclairage coordinates at 7.0 V; <sup>b</sup>  $\eta_{\text{ext}}$ , external quantum efficiency in the order of maximum, and at the brightness of 100 and 1000 cd m<sup>-2</sup>, respectively.

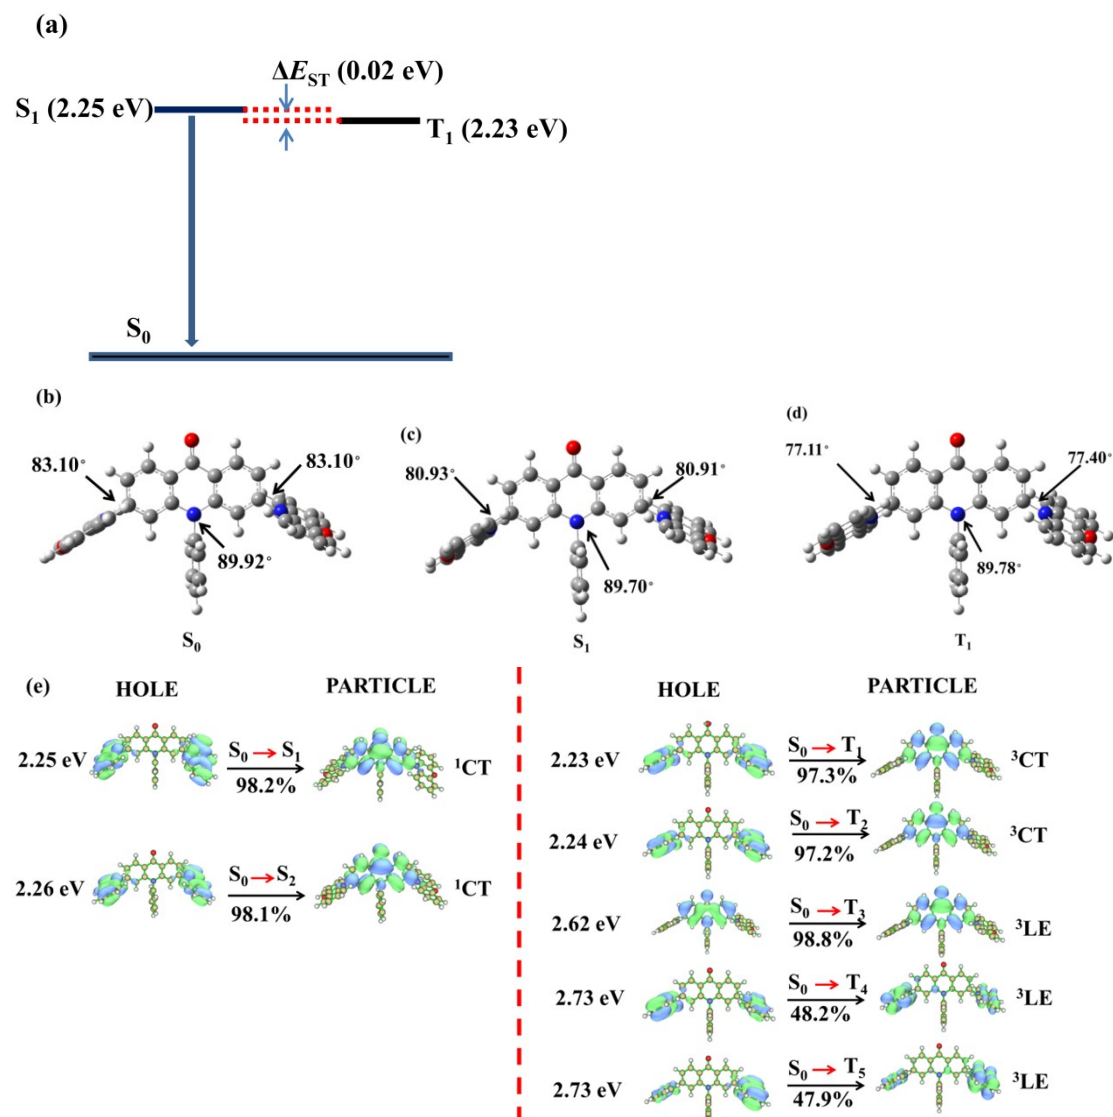

**Fig. S1** Calculated energies for the  $S_1$  and  $T_1$  excited states (a), the optimized geometries for the  $S_0$ ,  $S_1$ , and  $T_1$  states (b-d) by TD-DFT method, and the NTOs calculated using Multiwfn 3.5 (e)<sup>3</sup> of 3,6-DPXZ-AD.

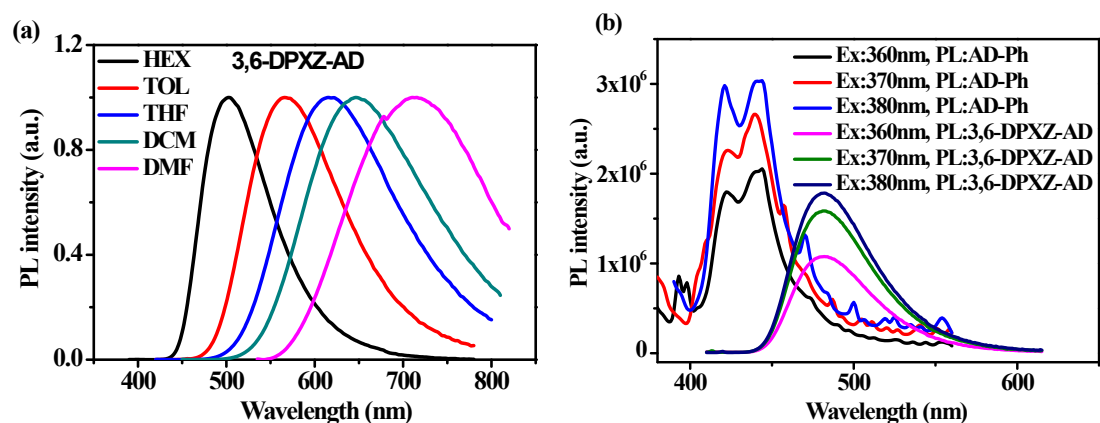

**Fig. S2** The steady-state PL spectra of 3,6-DPXZ-AD in different solvents (a) and of AD-Ph and 3,6-DPXZ-AD at different excitation wavelengths (from 360 to 380 nm) in toluene (TOL) solution (b).

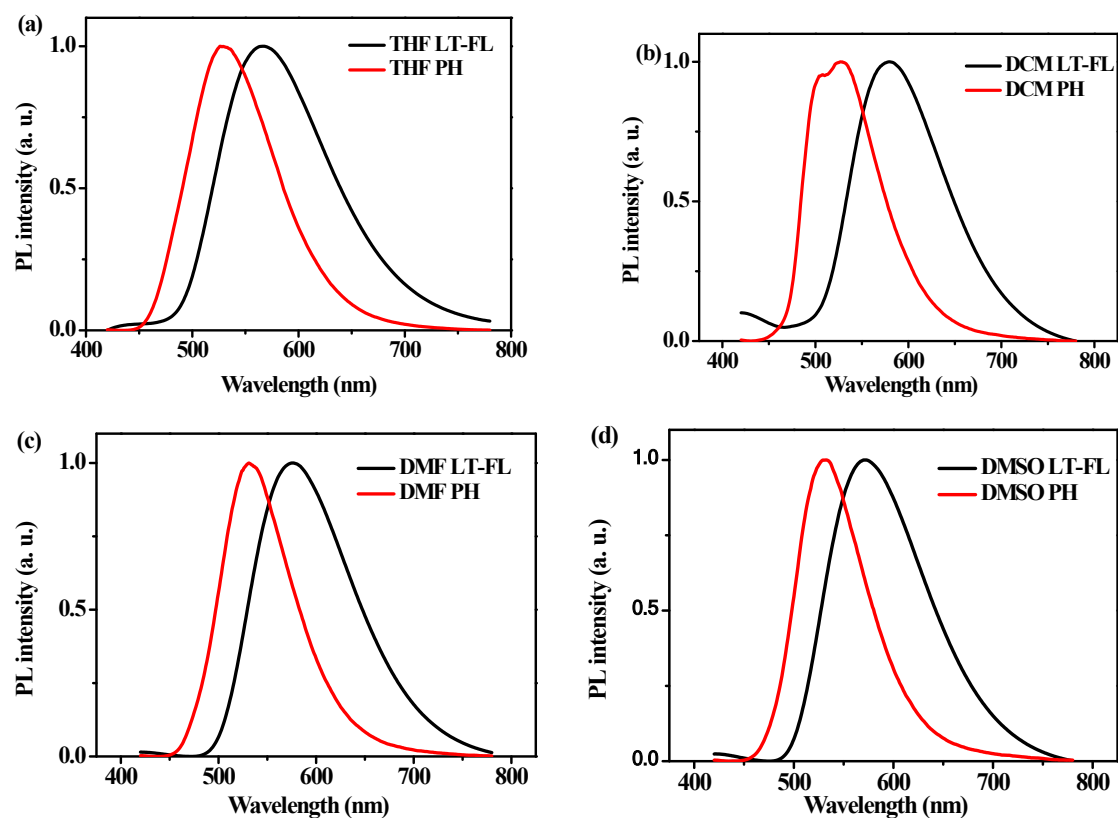

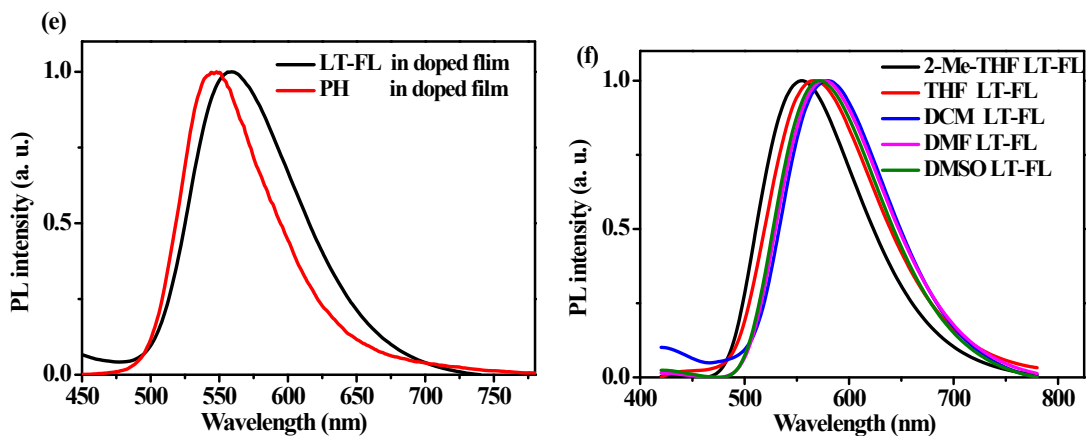

**Fig. S3** LT-FL and PH spectra of 3,6-DPXZ-AD in frozen THF (a), DCM (b), DMF (c) and DMSO (d) solutions and doped film (e) at 77 K, fluorescence spectra in these solvents are compared in (f).

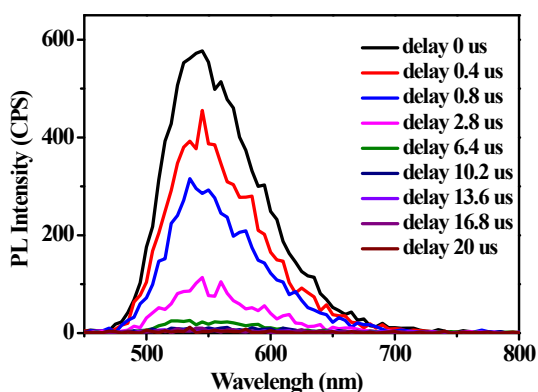

**Fig. S4** Time-resolved spectra of 7 wt% 3,6-DPXZ-AD:CBP film at different delay time.

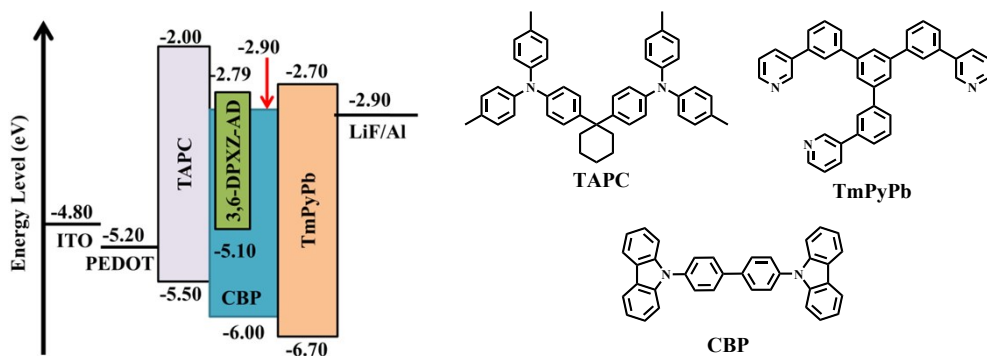

**Fig. S5** Energy diagram of the 3,6-DPXZ-AD based OLED and the chemical structures of the materials.



### 3. References

- 1 L. A. Andronico, A. Quintavalla, M. Lombardo, M. Mirasoli, M. Guardigli, C. Trombini and A. Roda, *Chem. Eur. J.*, 2016, **22**, 18156-18168.
- 2 L. Gan, Z. Xu, Z. Wang, B. Li, W. Li, X. Cai, K. Liu, Q. Liang and S. J. Su, *Adv. Funct. Mater.*, 2019, **29**, 1808088.
- 3 T. Lu, Chen. F. A Multifunctional Wavefunction Analyzer. *J. Comput. Chem.*, 2012, **33**, 580-592.
